# Supplementary figures and images for: Strong changes in englacial temperatures despite insignificantchanges in ice thickness at Dôme du Goûter glacier (Mont-Blanc area)
Source: Copernicus journal article supplement (doi:10.5194/tc-2019-158), 2019-09-04

**Supplementary Material**

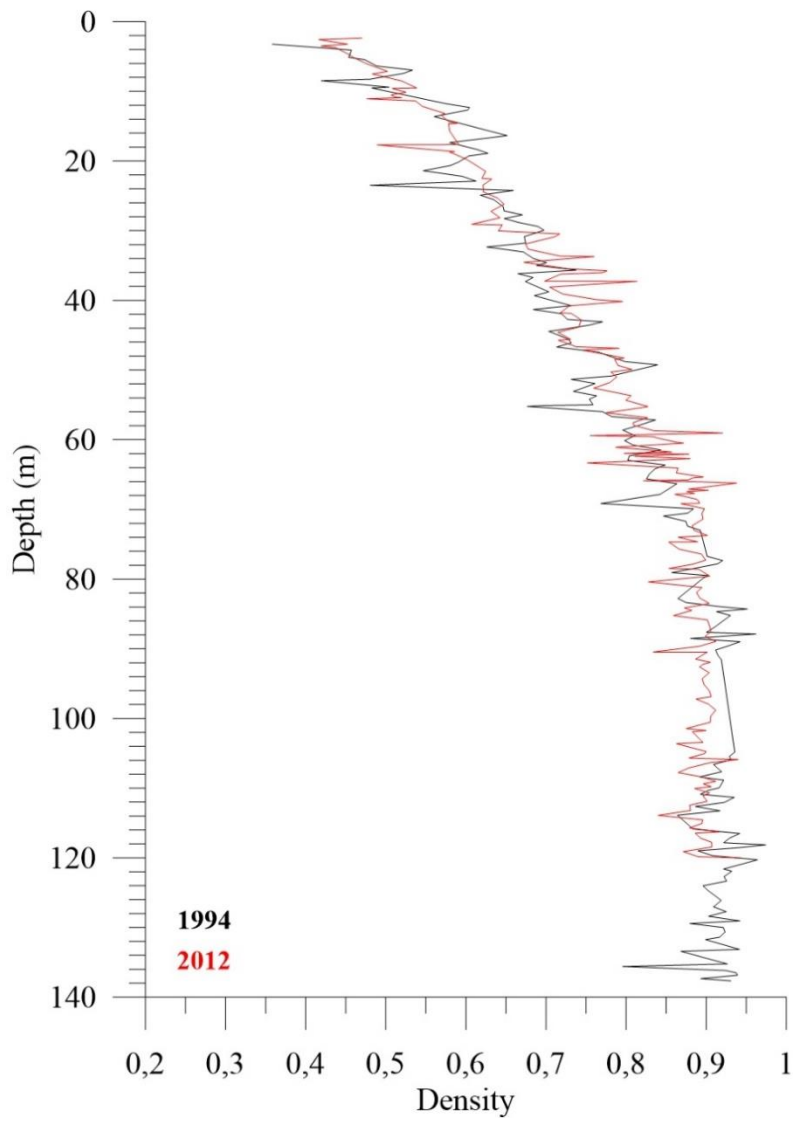

*Figure S1: Density profiles in 1994 (black line) and 2012 (red line).*

Supplement: Supplementary file 1 [file tc-2019-158-supplement.pdf]
